# Supplementary material for: Reduced graphene oxide (RGO)-supported NiCo2O4nanoparticles: an electrocatalyst for methanol oxidation
Source: Royal Society of Chemistry journal article supplement (doi:10.1039/c4nr02370f), 2014-07-03
Supplement: c4nr02370f1.pdf [file c4nr02370f1.pdf]

## Supporting Information

### Reduced graphene oxide-supported $\text{NiCo}_2\text{O}_4$ nanoparticles: An electrocatalyst for methanol oxidation

Ashok Kumar Das<sup>1</sup>, Rama K Layek<sup>1</sup>, Nam Hoon Kim<sup>1\*</sup>, Daeseung Jung<sup>1</sup>, Joong Hee Lee<sup>1,2\*</sup>

<sup>1</sup>Applied Materials Institute for BIN Convergence (BK Plus Global Team), Department of BIN Fusion Technology, Chonbuk National University, Jeonju, Jeonbuk 561-756, Republic of Korea

<sup>2</sup>Department of Hydrogen and Fuel Cell Engineering, Chonbuk National University, Jeonju, Jeonbuk 561-756, Republic of Korea

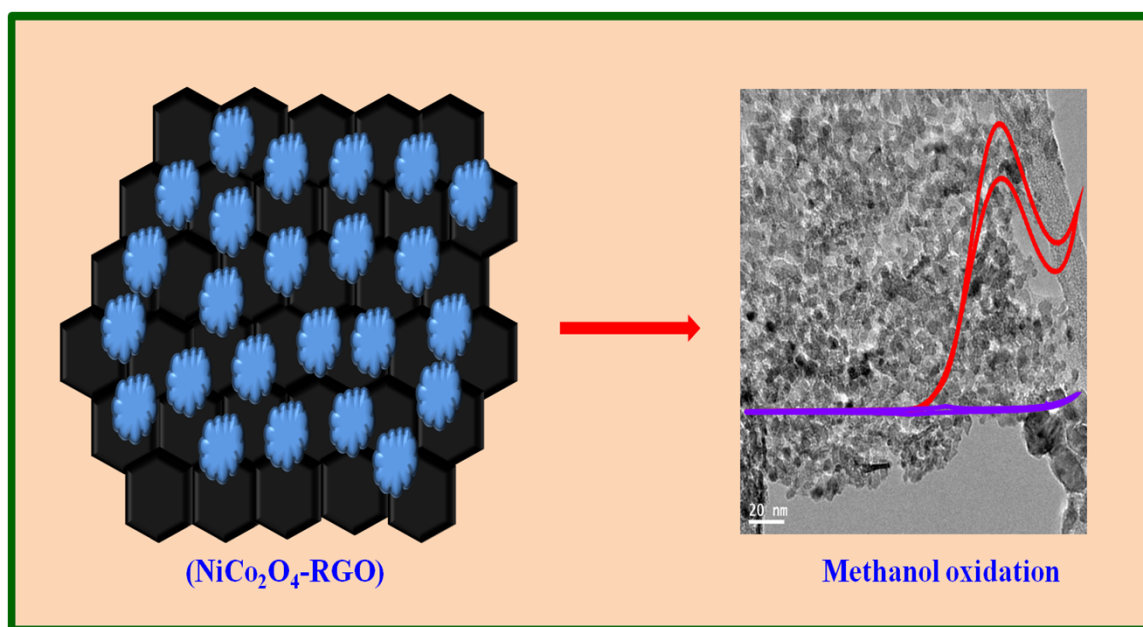

## **Experimental**

### **1. Preparation of graphene oxide (GO)**

Graphene oxide (GO) was synthesized by using a modified Hummers method.<sup>1</sup> Briefly, 2 g of natural graphite flakes were put in a round bottom flask containing 46 mL of concentrated H<sub>2</sub>SO<sub>4</sub>. This round-bottomed flask was transferred to an ice bath with a temperature of approximately 0-5 °C, 6 g of solid KMnO<sub>4</sub> was then added slowly, and the mixture was stirred for 2 h. The round-bottomed flask was then transferred to an oil bath that had been pre-heated to 35 °C and was stirred overnight. After that, 90 mL of de-ionized (DI) water was added to it, followed by stirring for another 2 h. Then, a 35% H<sub>2</sub>O<sub>2</sub> was added slowly to achieve a bright yellow reaction mixture. The excess manganese salt that was present in the GO was removed using dilute hydrochloric acid (5% by volume). The GO was washed several times and dispersed in water for one month. After one month, the brown precipitate was collected and dried in a vacuum oven.

### **2. Preparation of the working electrodes**

A glassy carbon (GC) electrode was polished with slurry of alumina powder and was subjected to ultrasonication for 5 min in deionized water. This electrode was washed carefully with water and dried in air before modification with the NiCo<sub>2</sub>O<sub>4</sub>-RGO hybrid. Typically, 10 mg of the NiCo<sub>2</sub>O<sub>4</sub>-RGO composite was dispersed ultrasonically in an ethanolic solution of 20% Nafion, and 20 µL was taken out of this dispersion and drop-casted on the electrode surface. The NiCo<sub>2</sub>O<sub>4</sub>-RGO hybrid modified electrode was dried at room temperature and was used in further electrochemical investigations. Similar method was followed for the preparation of the electrode based on NiCo<sub>2</sub>O<sub>4</sub> and RGO using the same mass as in the case of NiCo<sub>2</sub>O<sub>4</sub>-RGO composite.

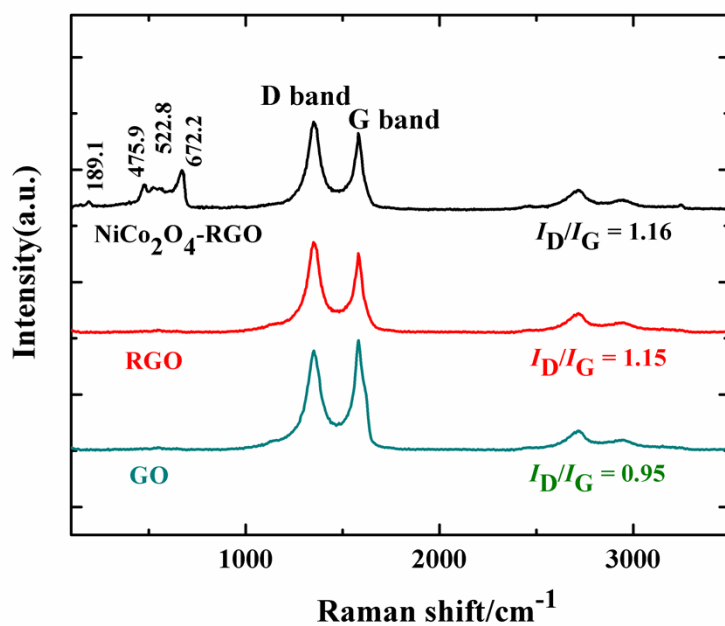

**Fig. S1.** Raman spectra obtained for GO, RGO and NiCo<sub>2</sub>O<sub>4</sub>-RGO hybrid.

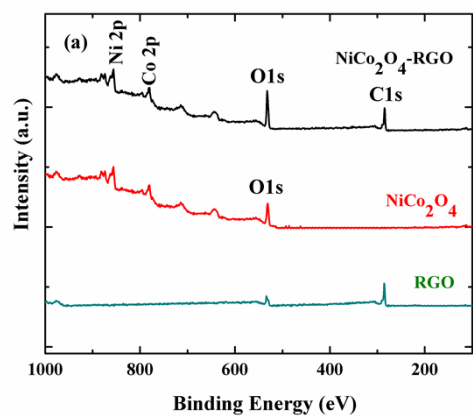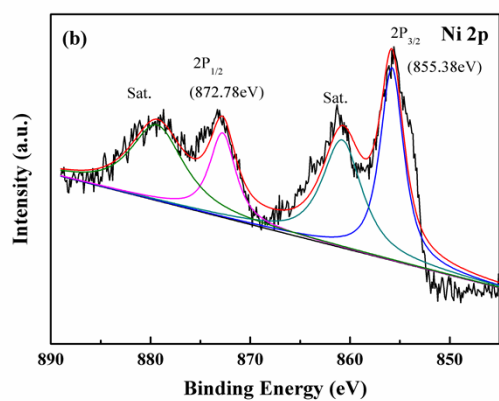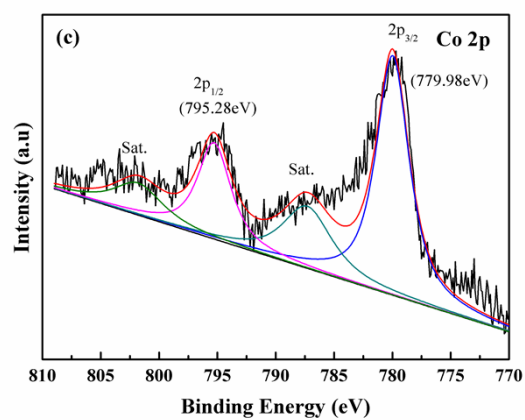

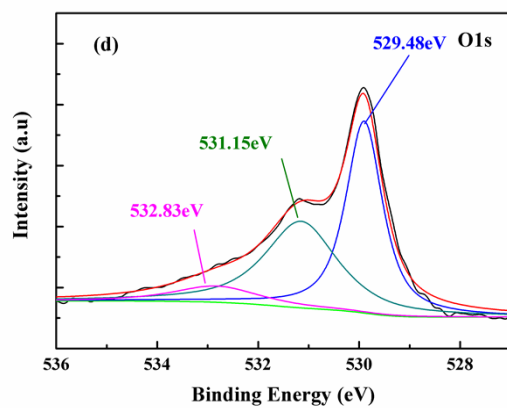

**Fig. S2.** XPS survey spectra of RGO,  $\text{NiCo}_2\text{O}_4$  and  $\text{NiCo}_2\text{O}_4$ -RGO hybrid (a), and deconvoluted Ni 2p (b), Co 2p (c) and O 1s (d) XPS spectra of  $\text{NiCo}_2\text{O}_4$ -RGO hybrid

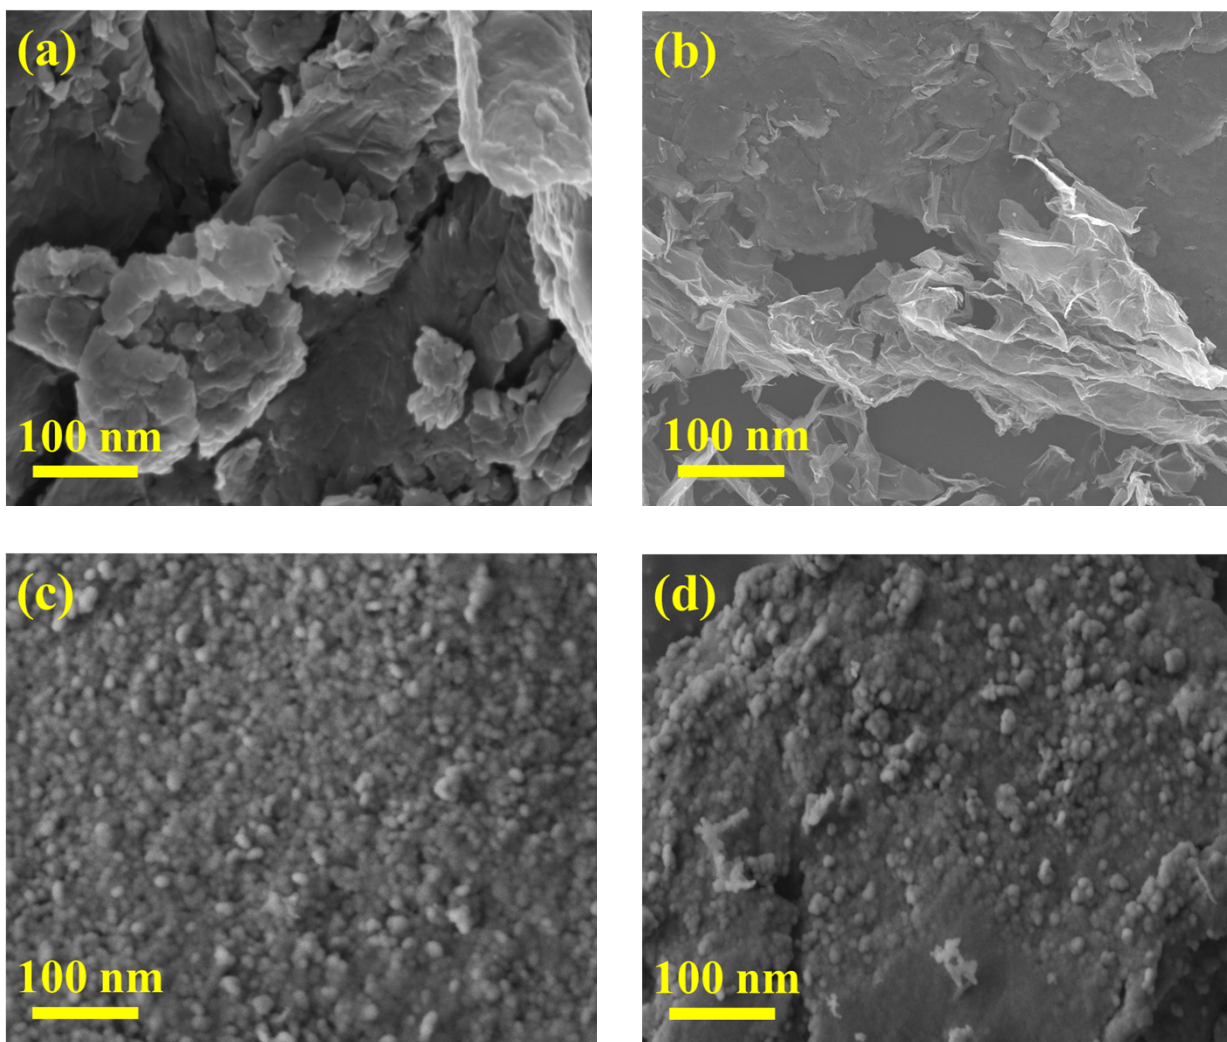

**Fig. S3.** FE-SEM images of (a) GO, (b) RGO, (c)  $\text{NiCo}_2\text{O}_4$  and (d)  $\text{NiCo}_2\text{O}_4$ -RGO hybrid.

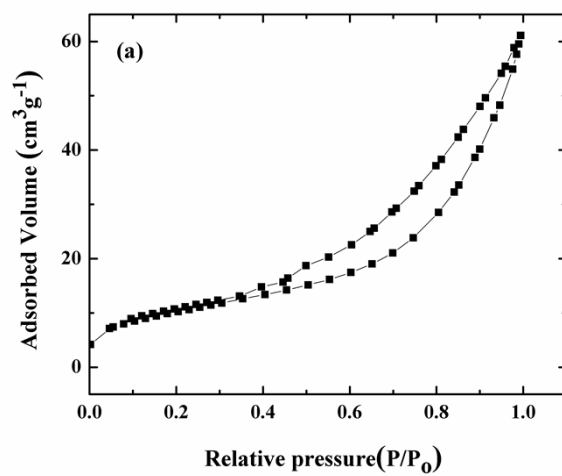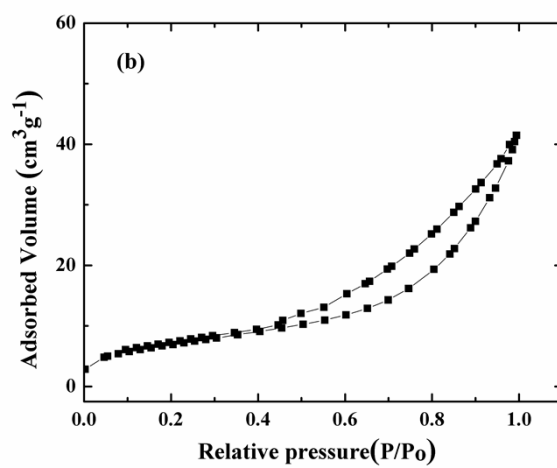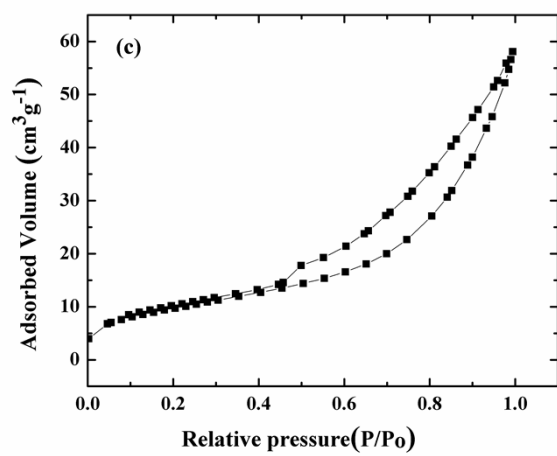

**Fig. S4.** BET surface area of (a) RGO, (b)  $\text{NiCo}_2\text{O}_4$  and (c)  $\text{NiCo}_2\text{O}_4$ -RGO hybrid

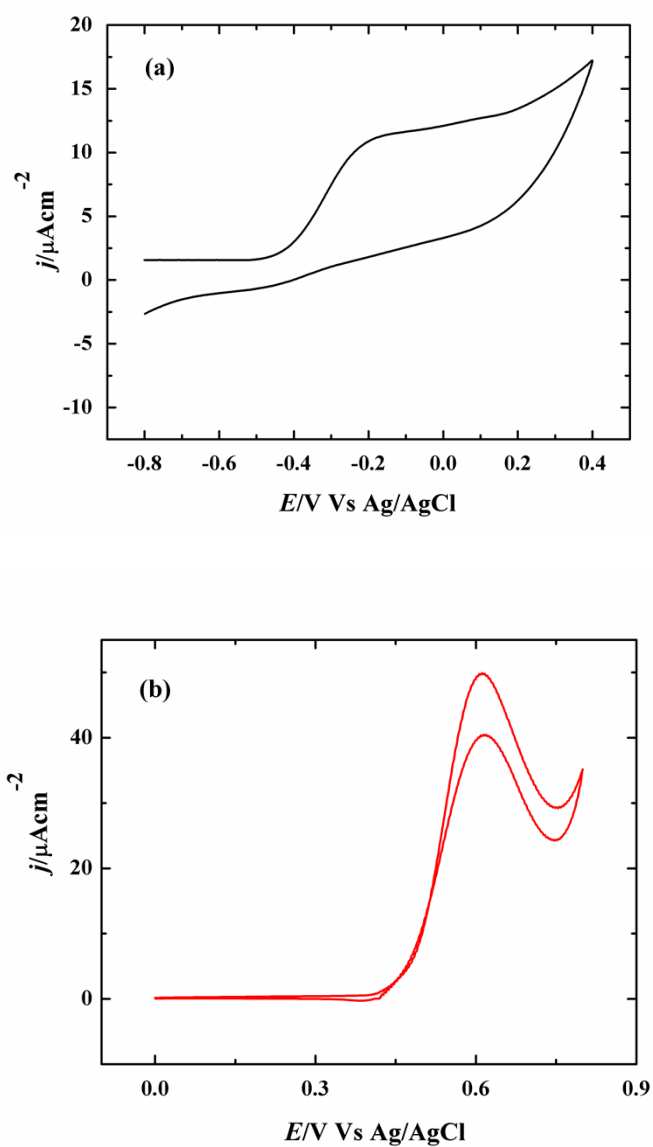

**Fig. S5.** Cyclic voltammetric response of the electrodes modified with (a) Pt/C and (b) NiCo<sub>2</sub>O<sub>4</sub>-RGO in 0.1 M KOH containing 0.5M methanol. Scan rate: 50 mV/s.

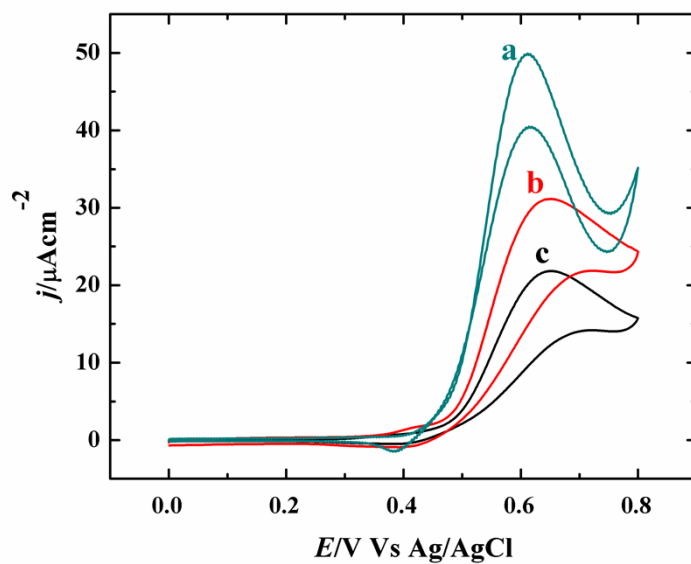

**Fig. S6.** Cyclic voltammetric response of the electrodes modified with NiCo<sub>2</sub>O<sub>4</sub>-RGO hybrid of (a) 2:1, (b) 1:1 and (c) 0.5:1 molar ratio in 0.1 M KOH containing 0.5M methanol at scan rate: 50 mV/s.

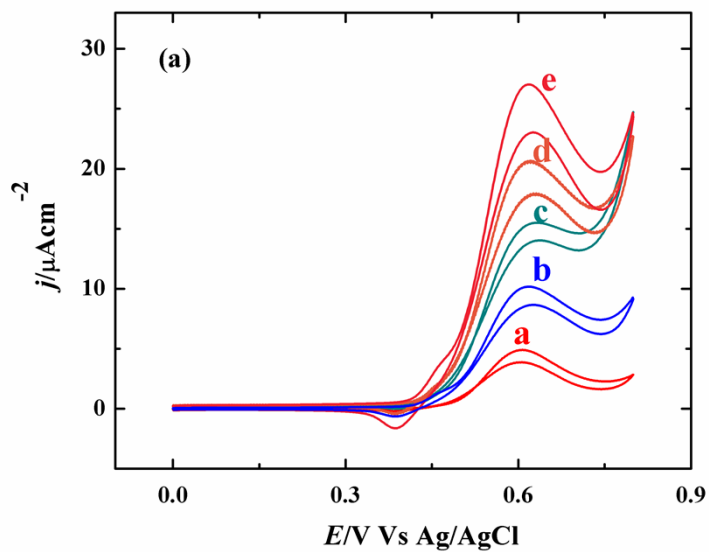

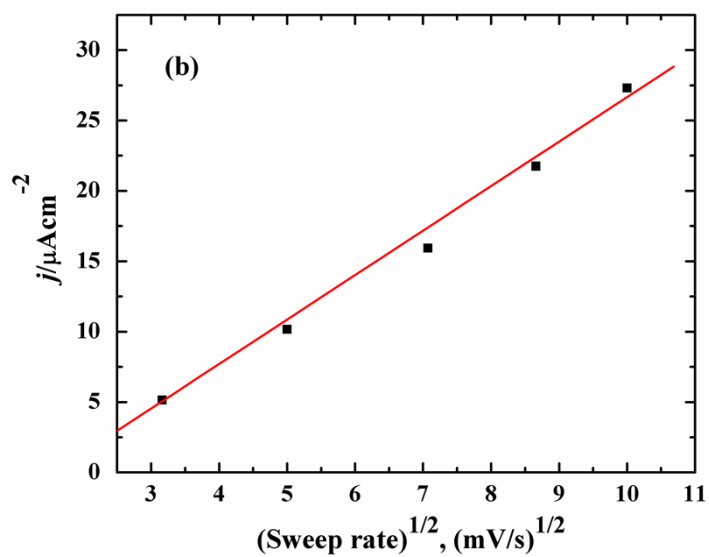

**Fig. S7.** (a) Cyclic voltammetric response of NiCo<sub>2</sub>O<sub>4</sub>-RGO hybrid based electrode in 0.1 M KOH containing 0.5 M methanol at different scan rates; a: 10, b: 25, c: 50, d: 75 and e: 100 mV/s, and (b) the plot of catalytic current Vs square root of scan rate.

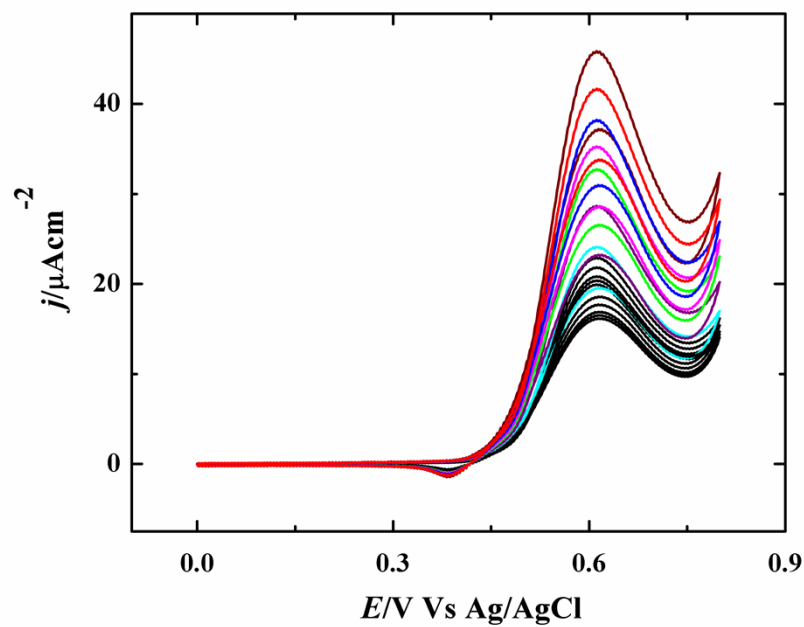

**Fig. S8.** Cyclic voltammetric response of NiCo<sub>2</sub>O<sub>4</sub>-RGO hybrid in 0.1 M KOH containing different concentrations of methanol at scan rate: 50 mV/s.

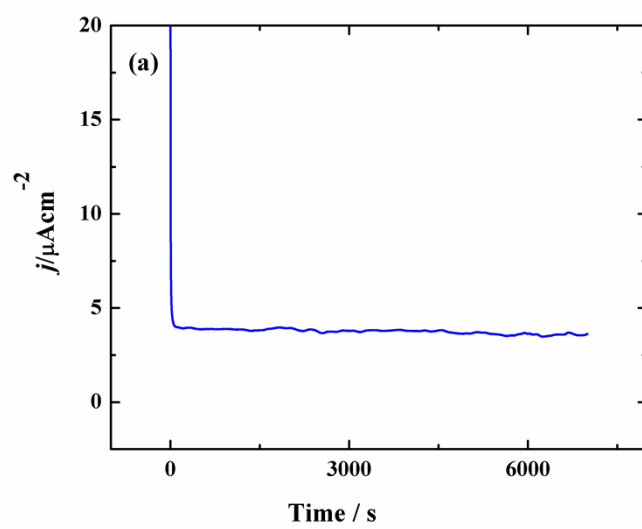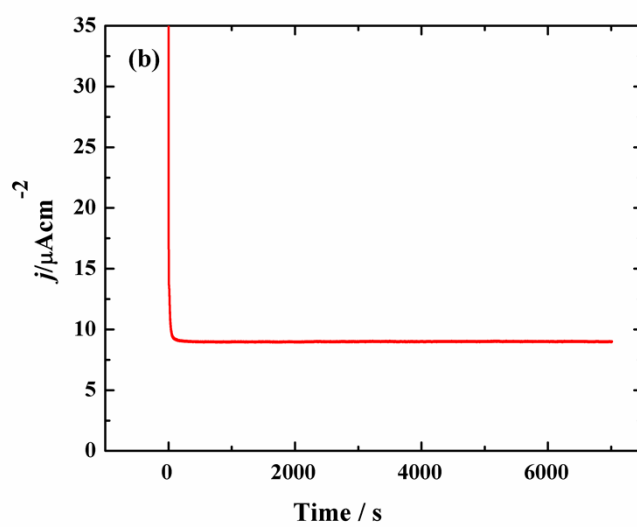

**Fig. S9.** Chronoamperometry curves obtained on (a) Pt/C and (b) NiCo<sub>2</sub>O<sub>4</sub>-RGO-based electrode in 0.1 M KOH containing 0.1M methanol.

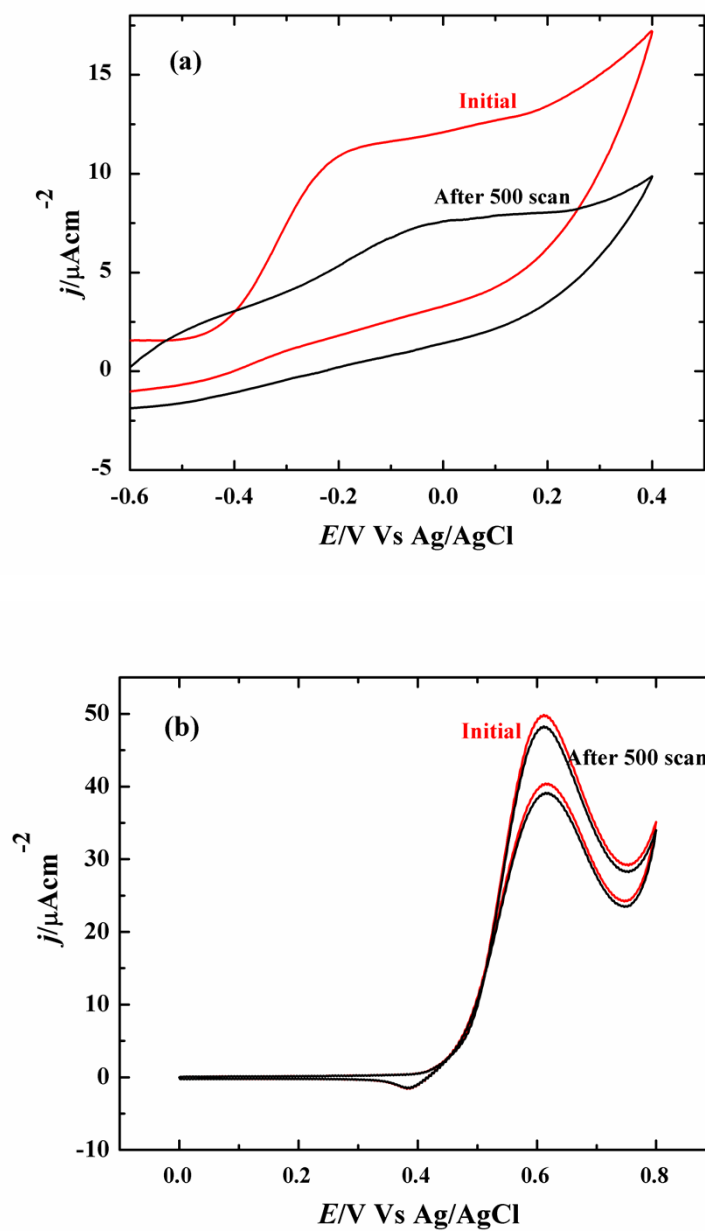

**Fig. S10.** Cyclic voltammetric response of (a) Pt/C and NiCo<sub>2</sub>O<sub>4</sub>-RGO-based electrode in 0.1 M KOH containing 0.5 M methanol at initial and after 500 scans. Scan rate: 50 mV/s.

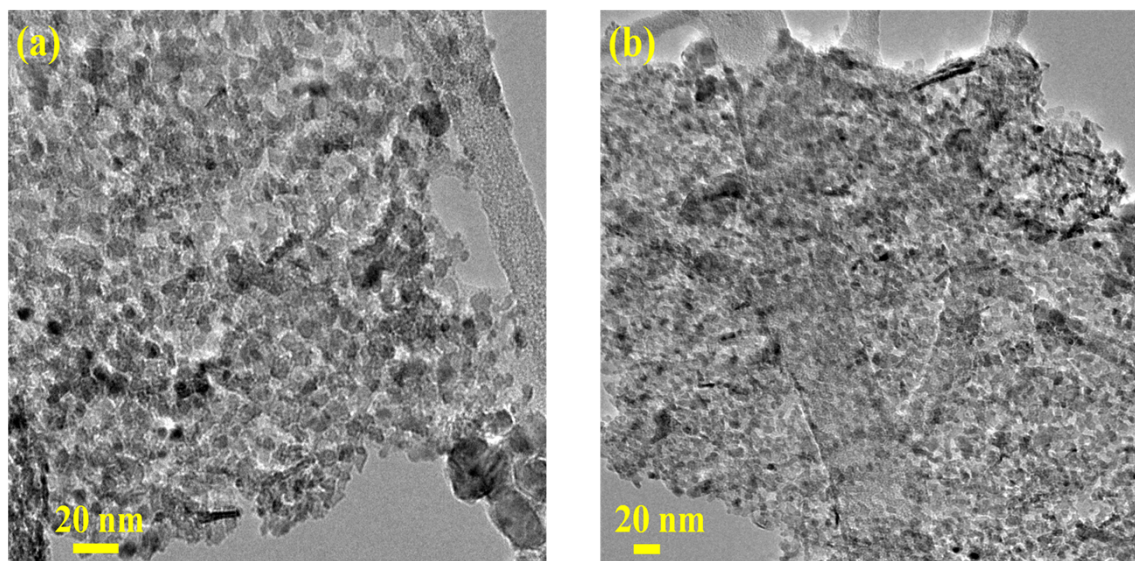

**Fig. S11.** TEM image of NiCo<sub>2</sub>O<sub>4</sub>-RGO hybrid (a) before and (b) after 500 cycles

**Table S1** Comparison of the oxidation peak potentials reported for electrochemical oxidation of methanol on the different electrodes.

| Samples                               | Oxidation potential (V) | References   |
|---------------------------------------|-------------------------|--------------|
| NiCo <sub>2</sub> O <sub>4</sub> -RGO | 0.6                     | Present work |
| Mesoporous nickel phosphate           | 0.65                    | 2            |
| Si- nickel phosphates                 | 0.65                    | 3            |
| Nickel oxide                          | 0.75                    | 4            |
| Ni-Co alloy                           | 0.62                    | 5            |
| Ni-Salophen                           | 0.65                    | 6            |
| Ni/NiODMG                             | 0.65                    | 7            |
| NiCo <sub>2</sub> O <sub>4</sub>      | 0.65                    | 8            |

## References

- 1 W. Hummers and R. Offeman, *J. Am. Chem. Soc.*, 1958, **80**, 1339
- 2 J. Tan, J. H. Yang, X. H. Liu, F. Yang, X. Y. Li, D. Ma, *Electrochem. Commun.*, 2012, **23**, 13-16.
- 3 J. Tan, J-H. Yang, X. Liu, F. Yang, X. Li, D. Ma, *Electrochem. Commun.*, 2013, **27**, 141-143.

- 4 N.Spinner, W. E. Mustain, *Electrochim. Acta* 2011, **56**, 5656-5666.
- 5 M. Asgari, M. G. Maragheh, R. Davarkhah, E. Lohrasbi, A. N. Golikand, *Electrochim. Acta*, 2012, **59**, 284-289.
- 6 A.N. Golikand, J. Raoof, M. Baghayeri, M. Asgari, L. Irannejad, *Russ. J. Electrochem.* 45 (2009) 192-198.
- 7 A.N. Golikand, M. Asgari, M.G. Maragheh, *J. Electroanal. Chem.* 588 (2006) 155-160.
- 8 M. U. A. Prathap, R. Srivastava, *Nano Energy*, 2013, **2**, 1046-1053.
